# Supplementary material for: Gene Expression Patterns during Light and Dark Infection of Prochlorococcus by Cyanophage
Source: PubMed Central journal article supplement (PMC5082946; doi:10.1371/journal.pone.0165375), 2016-10-27

**S1 Fig**

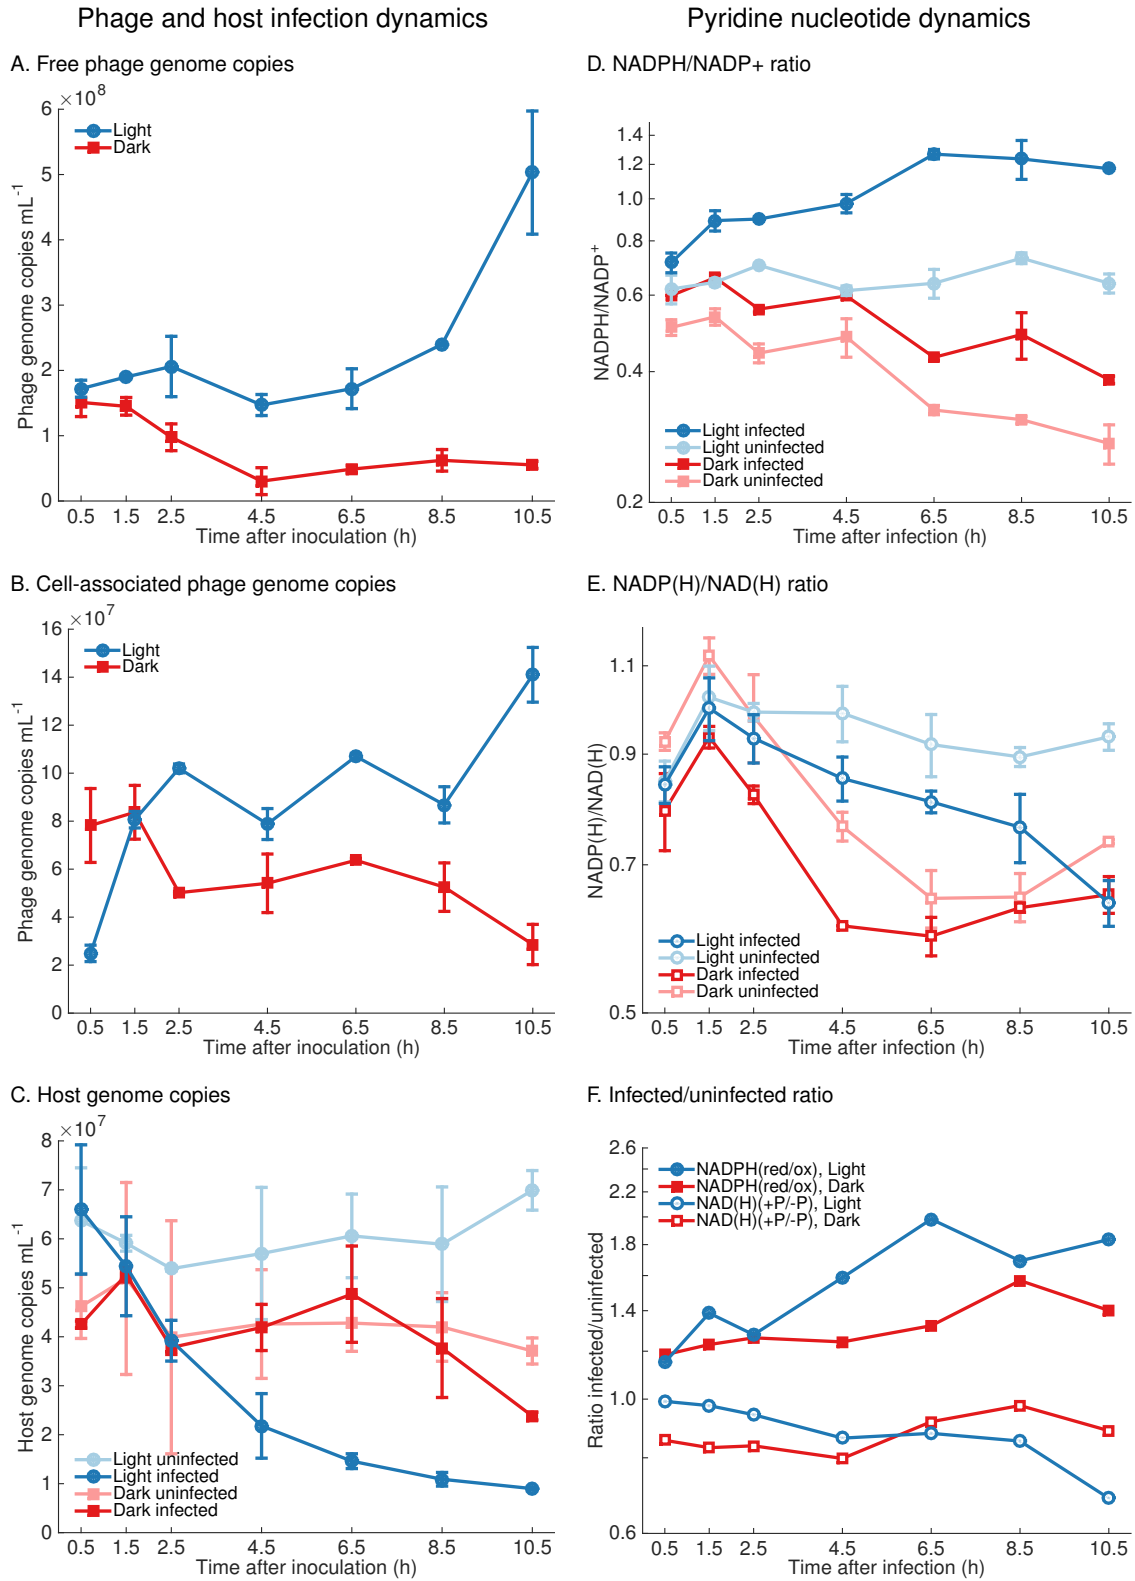

Supplement: pone.0165375.s001.pdf [file pone.0165375.s001.pdf]
