# Supplementary material for: Gene Expression Patterns during Light and Dark Infection of Prochlorococcus by Cyanophage
Source: PubMed Central journal article supplement (PMC5082946; doi:10.1371/journal.pone.0165375), 2016-10-27
Supplement: pone.0165375.s007.pdf [file pone.0165375.s007.pdf]

**S3 Table (Part A)**

| Locus tag                                                     | Counts (RPKM) |        | Fold ch.<br>(log <sub>2</sub> ) | Gene name and function                                 | Pathway                           |
|---------------------------------------------------------------|---------------|--------|---------------------------------|--------------------------------------------------------|-----------------------------------|
|                                                               | Inf.          | Uninf. |                                 |                                                        |                                   |
| *** Light: 0.5 h post-inoculation (phage or spent medium) *** |               |        |                                 |                                                        |                                   |
| PMM1385                                                       | 4269          | 1356   | 1.654 ↑                         | <i>hli11</i> , High light inducible protein            | Light stress response             |
| PMM1404                                                       | 837           | 292    | 1.521 ↑                         | <i>hli5</i> , High light inducible protein             | Light stress response             |
| PMM1135                                                       | 1401          | 500    | 1.487 ↑                         | <i>hli14</i> , High light inducible protein            | Light stress response             |
| PMM0336                                                       | 1465          | 587    | 1.320 ↑                         | Plastoquinol terminal oxidase (PTOX)                   | Photosynthetic electron transport |
| PMM1399                                                       | 774           | 347    | 1.156 ↑                         | <i>hli6</i> , High light inducible protein             | Light stress response             |
| PMM1398                                                       | 744           | 379    | 0.972 ↑                         | <i>hli7</i> , High light inducible protein             | Light stress response             |
| PMM1629                                                       | 1791          | 1124   | 0.672 ↑                         | Cyanobacteria-specific RpoD-like sigma factor, type-6  | Transcription                     |
| PMM1663                                                       | 588           | 910    | -0.631 ↓                        | Photosystem I assembly related protein Ycf37           | Photosynthesis: PSI               |
| *** Light: 1.5 h post-inoculation (phage or spent medium) *** |               |        |                                 |                                                        |                                   |
| PMM0814                                                       | 1820          | 1086   | 0.744 ↑                         | Cytochrome <i>c</i> oxidase subunit VIb-like           | Photosynthetic electron transport |
| RNA_15                                                        | 272           | 551    | -1.021 ↓                        | tRNA-Arg2, tRNA-Arg-CCG                                | Protein translation               |
| PMM0510                                                       | 1266          | 2068   | -0.708 ↓                        | Possible reverse transcriptase, RNA-dependent          | Reverse transcription             |
| PMM0573                                                       | 4844          | 7419   | -0.615 ↓                        | AbrB family transcriptional regulator                  | Transcriptional regulation        |
| PMM0290                                                       | 218           | 320    | -0.558 ↓                        | Possible ABC transporter, ATP-binding component        | Transport                         |
| PMM1309                                                       | 533           | 771    | -0.533 ↓                        | <i>ftsZ</i> , Cell division protein FtsZ (EC 3.4.24.-) | Cell division                     |
| *** Light: 2.5 h post-inoculation (phage or spent medium) *** |               |        |                                 |                                                        |                                   |
| PMM0223                                                       | 25985         | 18992  | 0.452 ↑                         | <i>psbA</i> , Photosystem II protein D1 (PsbA)         | Photosynthesis: PSII              |
| PMM1167                                                       | 297           | 510    | -0.778 ↓                        | Macrophage migration inhibitory factor family          | (unknown)                         |
| PMM1568                                                       | 1580          | 2424   | -0.617 ↓                        | Hypothetical membrane protein                          | Membrane proteins                 |
| *** Light: 4.5 h post-inoculation (phage or spent medium) *** |               |        |                                 |                                                        |                                   |
| PMM0272                                                       | 6299          | 3626   | 0.797 ↑                         | <i>psbK</i> , Photosystem II protein PsbK              | Photosynthesis: PSII              |
| PMM0573                                                       | 3204          | 4931   | -0.622 ↓                        | AbrB family transcriptional regulator (part 2)         | Transcriptional regulation        |
| PMM1148                                                       | 2821          | 3981   | -0.497 ↓                        | Possible 7kD DNA-binding domain                        | DNA-binding domains               |
| *** Light: 8.5 h post-inoculation (phage or spent medium) *** |               |        |                                 |                                                        |                                   |
| PMM0272                                                       | 6608          | 3754   | 0.816 ↑                         | <i>psbK</i> , Photosystem II protein PsbK              | Photosynthesis: PSII              |
| RNA_17                                                        | 1806          | 1051   | 0.781 ↑                         | tRNA-Val2, tRNA-Val-TAC                                | Protein translation               |
| PMM0223                                                       | 27918         | 19335  | 0.530 ↑                         | <i>psbA</i> , Photosystem II protein D1 (PsbA)         | Photosynthesis: PSII              |
| PMM1402                                                       | 203           | 452    | -1.152 ↓                        | Ferredoxin-NADP(+) reductase (EC 1.18.1.2) (FNR)       | Photosynthetic electron transport |
| PMM0987                                                       | 1481          | 3102   | -1.067 ↓                        | <i>rpsU</i> , SSU ribosomal protein S21p               | Ribosome                          |
| PMM1007                                                       | 218           | 415    | -0.928 ↓                        | Cell division protein FtsK                             | Cell division                     |
| PMM1183                                                       | 2051          | 3476   | -0.761 ↓                        | <i>rpmH</i> , LSU ribosomal protein L34p               | Ribosome                          |
| PMM0870                                                       | 3918          | 6476   | -0.725 ↓                        | <i>rpmG</i> , LSU ribosomal protein L33p               | Ribosome                          |
| PMM0732                                                       | 657           | 1048   | -0.674 ↓                        | Possible major surface glycoprotein                    | Cell surface glycoproteins        |
| RNA_8                                                         | 1792          | 2774   | -0.630 ↓                        | tRNA-Lys1, tRNA-Lys-TTT                                | Protein translation               |
| PMM0870                                                       | 4417          | 6814   | -0.625 ↓                        | <i>rpmG</i> , SSU ribosomal protein S18p               | Ribosome                          |
| PMM0500                                                       | 602           | 920    | -0.611 ↓                        | Cyanobacterial protein slr0575                         | (unknown)                         |
| PMM1171                                                       | 766           | 1160   | -0.598 ↓                        | <i>isiB</i> , Flavodoxin 1                             | Photosynthetic electron transport |
| PMM1655                                                       | 428           | 648    | -0.598 ↓                        | <i>tig</i> , Cell division trigger factor (EC 5.2.1.8) | Cell division                     |
| PMM1344                                                       | 1691          | 2522   | -0.577 ↓                        | <i>rplU</i> , LSU ribosomal protein L21p               | Ribosome                          |
| PMM0943                                                       | 2555          | 3798   | -0.572 ↓                        | <i>rpsO</i> , SSU ribosomal protein S15p (S13e)        | Ribosome                          |

**S3 Table (Part B)**

| Locus tag                                                    | Counts (RPKM) |        | Fold ch.<br>(log <sub>2</sub> ) | Gene name and function                                               | Pathway                              |
|--------------------------------------------------------------|---------------|--------|---------------------------------|----------------------------------------------------------------------|--------------------------------------|
|                                                              | Inf.          | Uninf. |                                 |                                                                      |                                      |
| *** Dark: 0.5 h post-inoculation (phage or spent medium) *** |               |        |                                 |                                                                      |                                      |
| No differentially expressed genes detected above thresholds  |               |        |                                 |                                                                      |                                      |
| *** Dark: 1.5 h post-inoculation (phage or spent medium) *** |               |        |                                 |                                                                      |                                      |
| No differentially expressed genes detected above thresholds  |               |        |                                 |                                                                      |                                      |
| *** Dark: 2.5 h post-inoculation (phage or spent medium) *** |               |        |                                 |                                                                      |                                      |
| PMM0263                                                      | 33247         | 21973  | 0.597 ↑                         | <i>amt1</i> , Ammonium transporter family                            | Transport                            |
| RNA_15                                                       | 178           | 483    | -1.435 ↓                        | tRNA-Arg2, tRNA-Arg-CCG                                              | Protein translation                  |
| PMM0689                                                      | 283           | 634    | -1.164 ↓                        | <i>hli22</i> , High light inducible protein                          | Light stress response                |
| RNA_20                                                       | 198           | 426    | -1.106 ↓                        | tRNA-Ser1, tRNA-Ser-GCT                                              | Protein translation                  |
| PMM0740                                                      | 401           | 839    | -1.065 ↓                        | <i>petN</i> , Cytochrome <i>b<sub>6</sub>f</i> complex subunit VIII  | Photosynthetic electron transport    |
| PMM0686                                                      | 295           | 601    | -1.029 ↓                        | <i>clpS</i> , ATP-dependent Clp protease adaptor protein ClpS        | Proteolysis                          |
| PMM0814                                                      | 832           | 1686   | -1.019 ↓                        | Cytochrome <i>c</i> oxidase subunit VIb-like                         | Photosynthetic electron transport    |
| PMM1503                                                      | 250           | 495    | -0.986 ↓                        | Possible NDP-sugar pyrophosphorylase, LPS biosynthesis               | Lipopolysaccharide biosynthesis      |
| PMM1588                                                      | 269           | 527    | -0.971 ↓                        | Possible conserved carboxylase domain                                | (unknown)                            |
| *** Dark: 4.5 h post-inoculation (phage or spent medium) *** |               |        |                                 |                                                                      |                                      |
| PMM0806                                                      | 1559          | 933    | 0.740 ↑                         | Bacterial regulatory proteins, Crp family                            | Transcriptional regulation           |
| PMM0941                                                      | 3461          | 2090   | 0.727 ↑                         | Possible cAMP phosphodiesterases class-II precursor                  | Signal transduction                  |
| RNA_3                                                        | 19142         | 12513  | 0.613 ↑                         | tRNA-Ile1, tRNA-Ile-GAT                                              | Protein translation                  |
| RNA_4                                                        | 10701         | 7789   | 0.458 ↑                         | tRNA-Ala1, tRNA-Ala-TGC                                              | Protein translation                  |
| PMM0263                                                      | 29002         | 21119  | 0.458 ↑                         | <i>amt1</i> , Ammonium transporter family                            | Transport                            |
| PMM0689                                                      | 151           | 371    | -1.294 ↓                        | <i>hli22</i> , High light inducible protein                          | Light stress response                |
| PMM1400                                                      | 1763          | 3777   | -1.099 ↓                        | Possible hemagglutinin-neuraminidase                                 | Viral proteins                       |
| PMM1122                                                      | 599           | 1237   | -1.046 ↓                        | <i>apt</i> , Adenine phosphoribosyltransferase (EC 2.4.2.7)          | Purine metabolism                    |
| PMM0814                                                      | 1071          | 1970   | -0.879 ↓                        | Cytochrome <i>c</i> oxidase subunit VIb-like                         | Photosynthetic electron transport    |
| RNA_16                                                       | 214           | 389    | -0.864 ↓                        | tRNA-Cys1, tRNA-Cys-GCA                                              | Protein translation                  |
| PMM1663                                                      | 924           | 1645   | -0.832 ↓                        | Photosystem I assembly related protein Ycf37                         | Photosynthesis: PSI                  |
| PMM0691                                                      | 209           | 370    | -0.824 ↓                        | Tryptophan-rich protein DUF2389, Ssr2843 homolog                     | (unknown)                            |
| PMM0747                                                      | 205           | 360    | -0.812 ↓                        | <i>pcyA</i> , Phycocyanobilin:ferredoxin oxidoreductase (EC 1.3.7.5) | Porphyrin and chlorophyll metabolism |
| PMM1437                                                      | 4805          | 8345   | -0.796 ↓                        | <i>groES</i> , Heat shock protein 60 family co-chaperone GroES       | Molecular chaperones                 |
| PMM0949                                                      | 195           | 338    | -0.795 ↓                        | COG1939: Ribonuclease III family protein                             | Nucleases                            |
| PMM2011                                                      | 271           | 466    | -0.781 ↓                        | Possible chorismate binding enzyme                                   | (unknown)                            |
| PMM1181                                                      | 209           | 358    | -0.775 ↓                        | <i>tyrA</i> , Chorismate mutase II (EC 5.4.99.5)                     | Phe, Tyr and Trp biosynthesis        |
| PMM1459                                                      | 258           | 441    | -0.771 ↓                        | <i>ccdA</i> , Cytochrome <i>c</i> -type biogenesis protein CcdA      | Photosynthetic electron transport    |
| PMM0686                                                      | 460           | 777    | -0.756 ↓                        | ATP-dependent Clp protease adaptor protein ClpS                      | Proteolysis                          |
| *** Dark: 8.5 h post-inoculation (phage or spent medium) *** |               |        |                                 |                                                                      |                                      |
| PMM0806                                                      | 1652          | 1046   | 0.659 ↑                         | Bacterial regulatory proteins, Crp family                            | Transcriptional regulation           |
| RNA_4                                                        | 12439         | 8693   | 0.517 ↑                         | tRNA-Ala1, tRNA-Ala-TGC                                              | Protein translation                  |
| PMM1119                                                      | 4183          | 2991   | 0.484 ↑                         | <i>som</i> , Possible porin                                          | Transport                            |
| PMM1121                                                      | 8685          | 6262   | 0.472 ↑                         | <i>som</i> , Possible porin                                          | Transport                            |
| PMM0263                                                      | 17076         | 12368  | 0.465 ↑                         | <i>amt1</i> , Ammonium transporter family                            | Transport                            |
| RNA_41                                                       | 4234          | 3140   | 0.431 ↑                         | 5S RNA                                                               | Protein translation                  |
| PMM1402                                                      | 393           | 681    | -0.794 ↓                        | Ferredoxin-NADP(+) reductase (EC 1.18.1.2) (FNR)                     | Photosynthetic electron transport    |
| PMM1629                                                      | 739           | 1246   | -0.753 ↓                        | Cyanobacteria-specific RpoD-like sigma factor, type-6                | Transcription                        |
