# Supplementary material for: Gene Expression Patterns during Light and Dark Infection of Prochlorococcus by Cyanophage
Source: PubMed Central journal article supplement (PMC5082946; doi:10.1371/journal.pone.0165375), 2016-10-27
Supplement: pone.0165375.s008.pdf [file pone.0165375.s008.pdf]

S4 Table (Part A)

| Locus tag                                                   | Counts (RPKM) |       | Fold ch.<br>(log <sub>2</sub> ) | Gene name and function                                                        | Pathway                                     |
|-------------------------------------------------------------|---------------|-------|---------------------------------|-------------------------------------------------------------------------------|---------------------------------------------|
|                                                             | Dark          | Light |                                 |                                                                               |                                             |
| *** Uninfected: 0.5 h post-inoculation (spent medium) ***   |               |       |                                 |                                                                               |                                             |
| No differentially expressed genes detected above thresholds |               |       |                                 |                                                                               |                                             |
| *** Uninfected: 1.5 h post-inoculation (spent medium) ***   |               |       |                                 |                                                                               |                                             |
| PMM0356                                                     | 10999         | 2995  | 1.877 ↑                         | Proline iminopeptidase (EC 3.4.11.5)                                          | Arginine and proline metabolism             |
| *** Uninfected: 2.5 h post-inoculation (spent medium) ***   |               |       |                                 |                                                                               |                                             |
| PMM0356                                                     | 14094         | 1490  | 3.242 ↑                         | Proline iminopeptidase (EC 3.4.11.5)                                          | Arginine and proline metabolism             |
| PMM1176                                                     | 1696          | 550   | 1.626 ↑                         | Possible Helix-turn-helix protein, CopG family                                | Transcriptional regulation                  |
| PMM1289                                                     | 214           | 640   | -1.582 ↓                        | Cyanobacteria-specific RpoD-like sigma factor, type-12                        | RNA polymerase                              |
| *** Uninfected: 4.5 h post-inoculation (spent medium) ***   |               |       |                                 |                                                                               |                                             |
| PMM0356                                                     | 11503         | 1484  | 2.955 ↑                         | Proline iminopeptidase (EC 3.4.11.5)                                          | Arginine and proline metabolism             |
| PMM1176                                                     | 2387          | 370   | 2.691 ↑                         | Possible Helix-turn-helix protein, CopG family                                | Transcriptional regulation                  |
| PMM1058                                                     | 490           | 94    | 2.379 ↑                         | <i>petG</i> , Cytochrome b6-f complex subunit V (PetG)                        | Photosynthesis                              |
| PMM1400                                                     | 3777          | 1174  | 1.686 ↑                         | Possible hemagglutinin-neuraminidase                                          | Viral proteins                              |
| PMM1179                                                     | 386           | 123   | 1.649 ↑                         | Permease of the drug/metabolite transporter (DMT) superfamily                 | Transport                                   |
| PMM1289                                                     | 86            | 682   | -2.993 ↓                        | Cyanobacteria-specific RpoD-like sigma factor, type-12                        | RNA polymerase                              |
| PMM1309                                                     | 164           | 749   | -2.192 ↓                        | <i>ftsZ</i> , Cell division protein FtsZ (EC 3.4.24.-)                        | Cell division                               |
| PMM0502                                                     | 158           | 626   | -1.984 ↓                        | Single-stranded DNA-binding protein                                           | Replication                                 |
| PMM0577                                                     | 271           | 974   | -1.844 ↓                        | Cyanobacteria-specific RpoD-like sigma factor, type-14                        | Transcriptional regulation                  |
| PMM0244                                                     | 315           | 1074  | -1.768 ↓                        | <i>dcd</i> , Deoxycytidine triphosphate deaminase (EC 3.5.4.13)               | Pyrimidine metabolism                       |
| PMM1711                                                     | 292           | 902   | -1.629 ↓                        | <i>sps</i> , Sucrose phosphate synthase (EC:2.4.1.14 )                        | Starch and sucrose metabolism               |
| PMM0245                                                     | 276           | 832   | -1.594 ↓                        | <i>cob(I)</i> alamin adenosyltransferase                                      | Porphyrin and chlorophyll metabolism        |
| PMM1697                                                     | 462           | 1367  | -1.565 ↓                        | Cyanobacteria-specific RpoD-like sigma factor, type-13                        | RNA polymerase                              |
| PMM0243                                                     | 226           | 663   | -1.549 ↓                        | <i>thyX</i> , Thymidylate synthase <i>thyX</i> (EC 2.1.1.-)                   | Pyrimidine metabolism                       |
| *** Uninfected: 8.5 h post-inoculation (spent medium) ***   |               |       |                                 |                                                                               |                                             |
| PMM0356                                                     | 14936         | 1565  | 3.255 ↑                         | Proline iminopeptidase (EC 3.4.11.5)                                          | Arginine and proline metabolism             |
| PMM1176                                                     | 2905          | 391   | 2.893 ↑                         | Possible Helix-turn-helix protein, CopG family                                | Transcriptional regulation                  |
| PMM1058                                                     | 1619          | 229   | 2.82 ↑                          | <i>petG</i> , Ribosomal RNA small subunit methyltransferase D (EC 2.1.1.-)    | Photosynthesis                              |
| PMM1179                                                     | 498           | 151   | 1.722 ↑                         | Permease of the drug/metabolite transporter (DMT) superfamily                 | Transport                                   |
| PMM0747                                                     | 489           | 170   | 1.52 ↑                          | <i>pcyA</i> , Phycocyanobilin:ferredoxin oxidoreductase (EC 1.3.7.5)          | Porphyrin and chlorophyll metabolism        |
| PMM1289                                                     | 72            | 809   | -3.487 ↓                        | Cyanobacteria-specific RpoD-like sigma factor, type-12                        | RNA polymerase                              |
| PMM1309                                                     | 62            | 637   | -3.355 ↓                        | <i>ftsZ</i> , Cell division protein FtsZ (EC 3.4.24.-)                        | Cell division                               |
| PMM0577                                                     | 122           | 1109  | -3.18 ↓                         | Cyanobacteria-specific RpoD-like sigma factor, type-14                        | Transcriptional regulation                  |
| PMM0245                                                     | 112           | 846   | -2.917 ↓                        | <i>cob(I)</i> alamin adenosyltransferase                                      | Porphyrin and chlorophyll metabolism        |
| PMM1711                                                     | 159           | 1051  | -2.724 ↓                        | <i>sps</i> , Sucrose phosphate synthase (EC:2.4.1.14 )                        | Starch and sucrose metabolism               |
| PMM0244                                                     | 154           | 1010  | -2.711 ↓                        | <i>dcd</i> , Deoxycytidine triphosphate deaminase (EC 3.5.4.13)               | Pyrimidine metabolism                       |
| PMM0502                                                     | 93            | 530   | -2.514 ↓                        | Single-stranded DNA-binding protein                                           | Replication                                 |
| PMM0243                                                     | 124           | 570   | -2.196 ↓                        | <i>thyX</i> , Thymidylate synthase <i>thyX</i> (EC 2.1.1.-)                   | Pyrimidine metabolism                       |
| PMM0330                                                     | 100           | 456   | -2.19 ↓                         | Possible LysM domain                                                          | Cell membrane                               |
| PMM0779                                                     | 112           | 482   | -2.11 ↓                         | <i>purS</i> , Phosphoribosylformylglycinamide synthase (EC 6.3.5.3)           | Purine metabolism                           |
| PMM0661                                                     | 262           | 1109  | -2.081 ↓                        | <i>nrdJ</i> , Ribonucleotide reductase class II (B12-dependent) (EC 1.17.4.1) | Purine and pyrimidine metabolism            |
| PMM0576                                                     | 131           | 549   | -2.069 ↓                        | COG3339 conserved hypothetical protein                                        | (unknown)                                   |
| PMM0660                                                     | 802           | 3322  | -2.051 ↓                        | Possible RNA recognition motif (RRM)                                          | Translational regulation                    |
| PMM0519                                                     | 363           | 1410  | -1.958 ↓                        | <i>talB</i> , Transaldolase (EC 2.2.1.2)                                      | Pentose phosphate pathway                   |
| PMM0970                                                     | 297           | 1109  | -1.899 ↓                        | <i>urtA</i> , Urea ABC transporter, substrate binding protein UrtA            | ABC transporters                            |
| N/A                                                         | 147           | 544   | -1.893 ↓                        | Protein family PM-1                                                           | (unknown)                                   |
| PMM1611                                                     | 164           | 599   | -1.87 ↓                         | <i>thiC</i> , Thiamin biosynthesis protein ThiC                               | Thiamine metabolism                         |
| PMM1321                                                     | 771           | 2759  | -1.839 ↓                        | Bacterial histone-like DNA-binding protein                                    | DNA-binding proteins                        |
| PMM1150                                                     | 223           | 746   | -1.741 ↓                        | Thioredoxin reductase (EC 1.8.1.9)                                            | Pyrimidine metabolism                       |
| PMM0387                                                     | 165           | 526   | -1.676 ↓                        | <i>aroD</i> , 3-dehydroquinate dehydratase II (EC 4.2.1.10)                   | Phe, Tyr and Trp biosynthesis               |
| PMM0920                                                     | 197           | 624   | -1.665 ↓                        | <i>glnA</i> , Glutamine synthetase type I (EC 6.3.1.2)                        | Alanine, aspartate and glutamate metabolism |
| PMM1657                                                     | 391           | 1181  | -1.596 ↓                        | <i>clpX</i> , ATP-dependent Clp protease ATP-binding subunit ClpX             | Proteolysis                                 |
| PMM1148                                                     | 1281          | 3829  | -1.579 ↓                        | Possible 7kD DNA-binding domain                                               | DNA-binding proteins                        |
| PMM1697                                                     | 367           | 1095  | -1.579 ↓                        | Cyanobacteria-specific RpoD-like sigma factor, type-13                        | RNA polymerase                              |
| PMM0258                                                     | 239           | 687   | -1.52 ↓                         | <i>glyA</i> , Serine hydroxymethyltransferase (EC 2.1.2.1)                    | Glycine, serine and threonine metabolism    |
| PMM1145                                                     | 146           | 413   | -1.502 ↓                        | <i>pntB</i> , NAD(P) transhydrogenase subunit beta (EC 1.6.1.2)               | Nicotinate and nicotinamide metabolism      |
| PMM1568                                                     | 888           | 2513  | -1.501 ↓                        | Hypothetical membrane protein                                                 | Membrane proteins                           |

**S4 Table (Part B)**

| Locus tag                                        | Counts (RPKM) |       | Fold ch.<br>(log <sub>2</sub> ) | Gene name and function                                          | Pathway                              |
|--------------------------------------------------|---------------|-------|---------------------------------|-----------------------------------------------------------------|--------------------------------------|
|                                                  | Dark          | Light |                                 |                                                                 |                                      |
| *** Infected: 0.5 h post-inoculation (phage) *** |               |       |                                 |                                                                 |                                      |
| PMM0336                                          | 209           | 1465  | -2.806 ↓                        | Plastoquinol terminal oxidase                                   | Photosynthetic electron transport    |
| PMM0817                                          | 110           | 657   | -2.573 ↓                        | <i>hli17</i> , High light inducible protein                     | Light stress response                |
| PMM1135                                          | 300           | 1401  | -2.226 ↓                        | <i>hli14</i> , High light inducible protein                     | Light stress response                |
| PMM1399                                          | 177           | 774   | -2.127 ↓                        | <i>hli6</i> , High light inducible protein                      | Light stress response                |
| PMM0817                                          | 188           | 768   | -2.028 ↓                        | <i>hli17</i> , High light inducible protein                     | Light stress response                |
| PMM0815                                          | 195           | 764   | -1.972 ↓                        | <i>hli19</i> , High light inducible protein                     | Light stress response                |
| PMM1399                                          | 154           | 586   | -1.926 ↓                        | <i>hli6</i> , High light inducible protein                      | Light stress response                |
| PMM1385                                          | 1246          | 4269  | -1.777 ↓                        | <i>hli11</i> , High light inducible protein                     | Light stress response                |
| PMM1398                                          | 234           | 744   | -1.668 ↓                        | <i>hli7</i> , High light inducible protein                      | Light stress response                |
| PMM1404                                          | 269           | 837   | -1.639 ↓                        | <i>hli5</i> , High light inducible protein                      | Light stress response                |
| *** Infected: 1.5 h post-inoculation (phage) *** |               |       |                                 |                                                                 |                                      |
| PMM0356                                          | 10006         | 1898  | 2.398 ↑                         | Proline iminopeptidase (EC 3.4.11.5)                            | Arginine and proline metabolism      |
| *** Infected: 2.5 h post-inoculation (phage) *** |               |       |                                 |                                                                 |                                      |
| PMM0356                                          | 14796         | 1292  | 3.518 ↑                         | Proline iminopeptidase (EC 3.4.11.5)                            | Arginine and proline metabolism      |
| PMM1289                                          | 207           | 656   | -1.666 ↓                        | Cyanobacteria-specific RpoD-like sigma factor, type-12          | RNA polymerase                       |
| PMM1539                                          | 189           | 548   | -1.533 ↓                        | <i>adk</i> , Adenylate kinase (EC 2.7.4.3)                      | Purine metabolism                    |
| *** Infected: 4.5 h post-inoculation (phage) *** |               |       |                                 |                                                                 |                                      |
| PMM0356                                          | 17034         | 1229  | 3.793 ↑                         | Proline iminopeptidase (EC 3.4.11.5)                            | Arginine and proline metabolism      |
| PMM1176                                          | 2236          | 451   | 2.311 ↑                         | Possible Helix-turn-helix protein, CopG family                  | Transcriptional regulation           |
| PMM0348                                          | 2839          | 888   | 1.676 ↑                         | Possible Spectrin repeat                                        | Cytoskeleton                         |
| PMM1289                                          | 89            | 707   | -2.995 ↓                        | Cyanobacteria-specific RpoD-like sigma factor, type-12          | RNA polymerase                       |
| PMM1711                                          | 251           | 1053  | -2.07 ↓                         | <i>sps</i> , Sucrose phosphate synthase( EC:2.4.1.14 )          | Starch and sucrose metabolism        |
| PMM0243                                          | 224           | 863   | -1.946 ↓                        | <i>thyX</i> , Thymidylate synthase <i>thyX</i> (EC 2.1.1.-)     | Pyrimidine metabolism                |
| PMM0244                                          | 352           | 1286  | -1.871 ↓                        | <i>dcd</i> , Deoxycytidine triphosphate deaminase (EC 3.5.4.13) | Pyrimidine metabolism                |
| PMM1309                                          | 190           | 661   | -1.801 ↓                        | <i>ftsZ</i> , Cell division protein FtsZ (EC 3.4.24.-)          | Cell division                        |
| PMM0245                                          | 284           | 924   | -1.701 ↓                        | <i>cob(I)</i> alamin adenosyltransferase                        | Porphyrin and chlorophyll metabolism |
| PMM0577                                          | 345           | 1038  | -1.587 ↓                        | Cyanobacteria-specific RpoD-like sigma factor, type-14          | Transcriptional regulation           |

(continued on next page)

**S4 Table (Part B) (continued)**

| Locus tag                                        | Counts (RPKM) |       | Fold ch.<br>(log <sub>2</sub> ) | Gene name and function                                                        | Pathway                                  |
|--------------------------------------------------|---------------|-------|---------------------------------|-------------------------------------------------------------------------------|------------------------------------------|
|                                                  | Dark          | Light |                                 |                                                                               |                                          |
| *** Infected: 8.5 h post-inoculation (phage) *** |               |       |                                 |                                                                               |                                          |
| PMM0356                                          | 15827         | 1379  | 3.521 ↑                         | Proline iminopeptidase (EC 3.4.11.5)                                          | Arginine and proline metabolism          |
| PMM1176                                          | 2772          | 517   | 2.424 ↑                         | Possible Helix-turn-helix protein, CopG family                                | Transcriptional regulation               |
| PMM0348                                          | 4088          | 1155  | 1.824 ↑                         | Possible Spectrin repeat                                                      | Cytoskeleton                             |
| PMM1400                                          | 3120          | 1043  | 1.581 ↑                         | Possible hemagglutinin-neuraminidase                                          | Viral proteins                           |
| PMM1289                                          | 72            | 731   | -3.35 ↓                         | Cyanobacteria-specific RpoD-like sigma factor, type-12                        | RNA polymerase                           |
| PMM1309                                          | 67            | 597   | -3.145 ↓                        | <i>ftsZ</i> , Cell division protein FtsZ (EC 3.4.24.-)                        | Cell division                            |
| PMM0577                                          | 140           | 1113  | -2.994 ↓                        | Cyanobacteria-specific RpoD-like sigma factor, type-14                        | Transcriptional regulation               |
| PMM0245                                          | 115           | 895   | -2.957 ↓                        | <i>cob(I)</i> alamin adenosyltransferase                                      | Porphyrin and chlorophyll metabolism     |
| PMM0244                                          | 165           | 1232  | -2.9 ↓                          | <i>dcd</i> , Deoxycytidine triphosphate deaminase (EC 3.5.4.13)               | Pyrimidine metabolism                    |
| PMM1711                                          | 168           | 1251  | -2.896 ↓                        | <i>sps</i> , Sucrose phosphate synthase( EC:2.4.1.14 )                        | Starch and sucrose metabolism            |
| PMM0243                                          | 136           | 725   | -2.412 ↓                        | <i>thyX</i> , Thymidylate synthase <i>thyX</i> (EC 2.1.1.-)                   | Pyrimidine metabolism                    |
| PMM0502                                          | 99            | 523   | -2.403 ↓                        | Single-stranded DNA-binding protein                                           | Replication                              |
| PMM1321                                          | 663           | 2902  | -2.131 ↓                        | Bacterial histone-like DNA-binding protein                                    | DNA-binding proteins                     |
| PMM1145                                          | 112           | 445   | -1.99 ↓                         | <i>pntB</i> , NAD(P) transhydrogenase subunit beta (EC 1.6.1.2)               | Nicotinate and nicotinamide metabolism   |
| PMM0661                                          | 260           | 1014  | -1.96 ↓                         | <i>nrdJ</i> , Ribonucleotide reductase class II (B12-dependent) (EC 1.17.4.1) | Purine and pyrimidine metabolism         |
| RNA_15                                           | 107           | 409   | -1.938 ↓                        | tRNA-Arg2, tRNA-Arg-CCG                                                       | Protein translation                      |
| PMM0576                                          | 124           | 474   | -1.936 ↓                        | COG3339 conserved hypothetical protein                                        | (unknown)                                |
| PMM0779                                          | 123           | 469   | -1.929 ↓                        | <i>purS</i> , Phosphoribosylformylglycinamide synthase (EC 6.3.5.3)           | Purine metabolism                        |
| PMM1697                                          | 308           | 1134  | -1.879 ↓                        | Cyanobacteria-specific RpoD-like sigma factor, type-13                        | RNA polymerase                           |
| PMM1146                                          | 212           | 746   | -1.815 ↓                        | <i>PntA-2</i> , NAD(P) transhydrogenase alpha subunit (EC 1.6.1.2)            | Nicotinate and nicotinamide metabolism   |
| PMM1380                                          | 184           | 624   | -1.761 ↓                        | HAD-superfamily hydrolase, subfamily IA, variant 3                            | Hydrolase (unknown)                      |
| PMM1150                                          | 211           | 694   | -1.719 ↓                        | Thioredoxin reductase (EC 1.8.1.9)                                            | Pyrimidine metabolism                    |
| PMM0258                                          | 214           | 690   | -1.692 ↓                        | <i>glyA</i> , Serine hydroxymethyltransferase (EC 2.1.2.1)                    | Glycine, serine and threonine metabolism |
| PMM0660                                          | 810           | 2438  | -1.59 ↓                         | Possible RNA recognition motif (RRM)                                          | Translational regulation                 |
| N/A                                              | 267           | 804   | -1.589 ↓                        | tRNA-Leu3, tRNA-Leu-CAA                                                       | Protein translation                      |
| PMM1611                                          | 189           | 549   | -1.536 ↓                        | <i>thiC</i> , Thiamin biosynthesis protein ThiC                               | Thiamine metabolism                      |
| PMM0740                                          | 362           | 1041  | -1.524 ↓                        | <i>petN</i> , Cytochrome b6f complex subunit VIII                             | Photosynthesis                           |
| PMM0117                                          | 404           | 1158  | -1.52 ↓                         | TPR-repeat protein, specific for cyanobacteria                                | (unknown)                                |
| PMM0128                                          | 356           | 1018  | -1.515 ↓                        | <i>rpaA</i> , Two-component system response regulator                         | Two-component system                     |
| PMM0970                                          | 353           | 1010  | -1.515 ↓                        | <i>urtA</i> , Urea ABC transporter, substrate binding protein UrtA            | ABC transporters                         |
| PMM0444                                          | 186           | 531   | -1.514 ↓                        | <i>ctaE</i> , Cytochrome c oxidase polypeptide III (EC 1.9.3.1)               | Oxidative phosphorylation                |
