# Supplementary material for: Gene Expression Patterns during Light and Dark Infection of Prochlorococcus by Cyanophage
Source: PubMed Central journal article supplement (PMC5082946; doi:10.1371/journal.pone.0165375), 2016-10-27
Supplement: pone.0165375.s010.pdf [file pone.0165375.s010.pdf]

**S6 Table**

| Locus tag   | Antisense/Sense | Gene name and function                                                                              |
|-------------|-----------------|-----------------------------------------------------------------------------------------------------|
| PMM1518     | 350.97          | FIG00940570: hypothetical protein                                                                   |
| PMM0661     | 154.70          | Hypothetical protein / 3'-end of class II ribonucleotide reductase NrdJ                             |
| PMM0337     | 84.46           | FIG00941997: hypothetical protein                                                                   |
| PMM1378     | 65.59           | <i>des/yocE</i> , Fatty acid desaturase, type 2                                                     |
| PMED4_15451 | 45.81           | FIG00941715: hypothetical protein                                                                   |
| PMM0220     | 44.29           | Conserved cyanobacterial protein CP12                                                               |
| PMM0855     | 43.13           | FIG00940706: hypothetical protein                                                                   |
| PMM0659     | 35.92           | DNA ligase (EC 6.5.1.2)                                                                             |
| PMM0467     | 33.55           | <i>gmk</i> , Guanylate kinase (EC 2.7.4.8)                                                          |
| PMED4_12831 | 32.57           | Hypothetical protein                                                                                |
| RNA_9       | 32.40           | tRNA-Pro2, tRNA-Pro-TGG                                                                             |
| PMM0014     | 31.95           | tRNA dihydrouridine synthase A                                                                      |
| RNA_22      | 31.15           | tRNA-Ala2, hypothetical protein                                                                     |
| PMM0050     | 27.52           | <i>argJ</i> , Glutamate N-acetyltransferase (EC 2.3.1.35) / N-acetylglutamate synthase (EC 2.3.1.1) |
| PMM1359     | 25.85           | Predicted membrane protein (COG2259)                                                                |
| PMM0350     | 25.82           | Possible TIR domain                                                                                 |
| PMM1058     | 25.19           | <i>petG</i> , Ribosomal RNA small subunit methyltransferase D (EC 2.1.1.-)                          |
| PMM1616     | 23.96           | <i>smpB</i> , tmRNA-binding protein SmpB                                                            |
| PMM0154     | 23.49           | FIG00941193: hypothetical protein                                                                   |
| PMM0852     | 20.94           | FIG00940874: hypothetical protein                                                                   |
| PMM1411     | 17.90           | Hypothetical protein                                                                                |
| PMM0854     | 16.39           | FIG00944560: hypothetical protein / 5'-end of cell division protein FtsH                            |
| PMED4_11021 | 16.28           | 3'-end of conserved hypothetical protein                                                            |
| PMM0267     | 16.03           | Phospholipase/carboxylesterase family protein, sll1284 homolog                                      |
| PMM1651     | 15.71           | tRNA(Ile)-lysine synthetase                                                                         |
| PMM1059     | 14.99           | Ribosomal RNA small subunit methyltransferase D (EC 2.1.1.-)                                        |
| PMM0721     | 14.32           | Possible myosin N-terminal SH3-like domain                                                          |
| N/A         | 14.15           | FIG00941249: hypothetical protein before PMM0810                                                    |
| PMED4_12821 | 13.22           | FIG00942324: hypothetical protein                                                                   |
| PMM1322     | 12.89           | <i>glgX</i> , Glycogen debranching enzyme (EC 3.2.1.-)                                              |
| N/A         | 12.33           | Hypothetical protein between PMM0308 and PMM0309                                                    |
| PMED4_16021 | 11.54           | FIG00944192: hypothetical protein                                                                   |
| PMM0301     | 11.04           | 5'-methylthioadenosine phosphorylase (EC 2.4.2.28)                                                  |
| PMM0928     | 10.46           | Hypothetical protein / 3'-end of preprotein translocase subunit SecF                                |
