# Supplementary material for: Gene Expression Patterns during Light and Dark Infection of Prochlorococcus by Cyanophage
Source: PubMed Central journal article supplement (PMC5082946; doi:10.1371/journal.pone.0165375), 2016-10-27
Supplement: pone.0165375.s011.pdf [file pone.0165375.s011.pdf]

**S7 Table**

| MED4 PMM number | Gene name          | Diel cycle [83] |           | Physicochemical stressors |         |         |          |                                         | Phage infection   |             |            |     |
|-----------------|--------------------|-----------------|-----------|---------------------------|---------|---------|----------|-----------------------------------------|-------------------|-------------|------------|-----|
|                 |                    | Expr. cluster   | Max. mRNA | High [60] light           | -N [84] | -P [44] | -Fe [70] | -CO <sub>2</sub> [5] (-O <sub>2</sub> ) | P-SSP7 [40] Light | P-HM2 Light | P-HM2 Dark |     |
| PMM0093         | <i>hli01</i>       | 1               | 16:00     |                           |         |         |          |                                         |                   |             | [-]        | [-] |
| PMM0064         | <i>hli02</i>       | 12              | 4:00      |                           |         |         |          |                                         |                   |             |            | [-] |
| PMM1482         | <i>hli03</i>       | 9               | 0:00      |                           |         | +       |          | -                                       |                   |             |            | [-] |
| PMM1118         | <i>hli04</i>       | 10              | 1:00      | +                         |         |         | +        | +                                       |                   |             |            |     |
| PMM1404         | <i>hli05</i>       | 17              | 17:00     | +                         |         |         | +        | +                                       |                   |             | +          | [-] |
| PMM0818/PMM1399 | <i>hli06/hli16</i> | 10              | 1:00      | +                         |         |         | +        | +                                       | +                 | +           | +          | [+] |
| PMM0817/PMM1398 | <i>hli07/hli17</i> | 10              | 1:00      | +                         |         |         | +        | +                                       | +                 | +           | +          | [+] |
| PMM0816/PMM1397 | <i>hli08/hli18</i> | 10              | 2:00      | +                         |         |         | +        | +                                       | +                 |             | [+]        |     |
| PMM0815/PMM1396 | <i>hli09/hli19</i> | 10              | 2:00      | +                         |         |         | +        | +                                       | +                 | +           | +          |     |
| PMM1390         | <i>hli10</i>       | 4               | 16:00     |                           | +       |         |          | +                                       |                   |             |            | [-] |
| PMM1385         | <i>hli11</i>       | 8               | 22:00     | +                         |         |         |          | +                                       |                   |             | +          |     |
| PMM1384         | <i>hli12</i>       | 8               | 23:00     | +                         |         |         |          | +                                       |                   |             | [-]        |     |
| PMM1317         | <i>hli13</i>       | 3               | 12:00     |                           |         |         |          |                                         |                   |             | [-]        |     |
| PMM1135         | <i>hli14</i>       | 10              | 1:00      | +                         |         |         | +        | +                                       | +                 | +           | +          | [-] |
| PMM1128         | <i>hli15</i>       | 17              | 8:00      | +                         | +       |         |          | (+)                                     |                   |             |            | [-] |
| PMM0471         | <i>hli20</i>       | 5               | 16:00     |                           |         |         |          |                                         |                   |             |            |     |
| PMM0690         | <i>hli21</i>       | 17              | 4:00      | +                         | +       |         |          | +                                       |                   |             |            |     |
| PMM0689         | <i>hli22</i>       | 11              | 0:00      | +                         | +       |         |          | +                                       |                   |             |            | -   |
